# Supplementary material for: Prevalence of molecular markers of artemisinin and lumefantrine resistance among patients with uncomplicated Plasmodium falciparum malaria in three provinces in Angola, 2015
Source: Springer Nature journal article supplement (doi:10.1186/s12936-018-2233-5), 2018-02-19
Supplement: MOESM1 [file 15478172]

**Additional File 1:** Association between *pfk13* and *pfmdr1* polymorphisms and late treatment failures observed during therapeutic efficacy studies in Angola, 2015, stratified by treatment, full data

|                           | Artemether-lumefantrine |                    |     |           |                                  |            | Dihydroartemisinin-piperaquine |                    |            |           |                                  |              | Artesunate-amodiaquine    |                    |              |           |                                  |          |            |      |
|---------------------------|-------------------------|--------------------|-----|-----------|----------------------------------|------------|--------------------------------|--------------------|------------|-----------|----------------------------------|--------------|---------------------------|--------------------|--------------|-----------|----------------------------------|----------|------------|------|
|                           | ACPR                    | Recrudescence (DF) | RR† | P-value†† | Recrudescence + Reinfection (DF) | P-value††† | ACPR                           | Recrudescence (DF) | RR†        | P-value†† | Recrudescence + Reinfection (DF) | P-value†††   | ACPR                      | Recrudescence (DF) | RR†          | P-value†† | Recrudescence + Reinfection (DF) | P-value† |            |      |
| <i>pfk13</i>              |                         |                    |     |           |                                  |            | <i>pfk13</i>                   |                    |            |           |                                  |              | <i>pfk13</i>              |                    |              |           |                                  |          |            |      |
| Wildtype                  | 165/166 (99%)           | 9/9 (100%)         | -   | -         | 28/28 (100%)                     | -          | Wildtype                       | 165/167 (99%)      | 1/1 (100%) | -         | -                                | 15/15 (100%) | -                         | Wildtype           | 94/94 (100%) | 0         | -                                | -        | 7/7(100%)  | -    |
| A578S                     | 1/166 (<1%)             | 0                  | 0   | 1         | -                                | -          | A578S                          | 2/167 (1%)         | 0          | 0         | 1                                | -            | -                         | A578S              |              |           |                                  |          |            |      |
| <i>pfmdr1</i> copy number |                         |                    |     |           |                                  |            | <i>pfmdr1</i> copy number      |                    |            |           |                                  |              | <i>pfmdr1</i> copy number |                    |              |           |                                  |          |            |      |
| 1                         | 171/171 (100%)          | 9/9 (100%)         | -   | -         | 26/26 (100%)                     | -          | 1                              | 185/185 (100%)     | 0          | -         | -                                | 13/13 (100%) | -                         | 1                  | 90/90 (100%) | 0         | -                                | -        | 7/7 (100%) | -    |
| <i>pfmdr1</i> haplotype   |                         |                    |     |           |                                  |            | <i>pfmdr1</i> haplotype        |                    |            |           |                                  |              | <i>pfmdr1</i> haplotype   |                    |              |           |                                  |          |            |      |
| NYD                       | 92/161 (57%)            | 8/9 (89%)          | Ref | Ref       | 23/28 (82%)                      | Ref        | NYD                            | 116/182 (64%)      | 1/1 (100%) | Ref       | Ref                              | 12/15 (80%)  | Ref                       | NYD                | 62/92 (67%)  | 0         | Ref                              | Ref      | 6/7 (86%)  | Ref  |
| YYD                       | 35/161 (22%)            | 1/9 (11%)          | 0.3 | 0.4       | 2/28 (7%)                        | 0.04       | YYD                            | 15/182 (8%)        | 0          | 0         | 1                                | 2/15 (13%)   | 0.7                       | YYD                | 7/92 (8%)    | 0         | 0                                | 1        | 1/7 (17%)  | 0.6  |
| NFD                       | 44/161 (27%)            | 4/9 (44%)          | 1.0 | 1         | 13/28 (46%)                      | 0.7        | NFD                            | 66/182 (36%)       | 1/1 (100%) | 1.75      | 1                                | 7/15 (47%)   | 1                         | NFD                | 28/92 (30%)  | 0         | 0                                | 1        | 2/7 (29%)  | 1    |
| YFD                       | 5/161 (3%)              | 1/9 (11%)          | 2.0 | 0.4       | 2/28 (7%)                        | 0.6        | YFD                            | 6/182 (3%)         | 0          | 0         | 1                                | 1/15 (7%)    | 0.5                       | YFD                | 0            | 0         | -                                | -        | 0          | -    |
| YYY                       | 5/161 (3%)              | 0                  | 0   | 1         | 0                                | 0.6        | YYY                            | 1/182 (<1%)        | 0          | 0         | 1                                | 0            | 1                         | YYY                | 0            | 0         | -                                | -        | 1/7 (14%)  | 0.1  |
| NY Y                      | 0                       | 0                  | 0   | 1         | 0                                | 1          | NY Y                           | 0                  | 0          | -         | -                                | 0            | -                         | NY Y               | 0            | 0         | -                                | -        | 0          | -    |
| YFY                       | 1/161 (<1%)             | 0                  | 0   | 1         | 0                                | 1          | YFY                            | 0                  | 0          | -         | -                                | 0            | -                         | YFY                | 0            | 0         | -                                | -        | 0          | -    |
| <i>pfmdr1</i> SNP         |                         |                    |     |           |                                  |            | <i>pfmdr1</i> SNP              |                    |            |           |                                  |              | <i>pfmdr1</i> SNP         |                    |              |           |                                  |          |            |      |
| N86                       | 121/161(75%)            | 9/9 (100%)         | Ref | Ref       | 27/28 (96%)                      | Ref        | N86                            | 163/182 (90%)      | 1/1 (100%) | Ref       | Ref                              | 15/15 (100%) | Ref                       | N86                | 86/92 (93%)  | 0         | Ref                              | Ref      | 6/7 (86%)  | Ref  |
| 86Y                       | 42/161 (26%)            | 1/9 (11%)          | 0.3 | 0.5       | 2/28 (7%)                        | 0.03       | 86Y                            | 22/182 (12%)       | 0          | 0         | 1                                | 3/15 (20%)   | 0.5                       | 86Y                | 7/92 (8%)    | 0         | 0                                | 1        | 2/7 (29%)  | 0.1  |
| Y184                      | 128/161 (80%)           | 8/9 (89%)          | Ref | Ref       | 23/28 (82%)                      | Ref        | Y184                           | 129/182 (71%)      | 1/1 (100%) | Ref       | Ref                              | 13/15 (86%)  | Ref                       | Y184               | 68/92 (74%)  | 0         | Ref                              | Ref      | 7/7 (100%) | Ref  |
| 184F                      | 48/161 (30%)            | 4/9 (44%)          | 1.3 | 0.7       | 13/28 (46%)                      | 0.3        | 184F                           | 71/182 (39%)       | 0          | 0         | 1                                | 8/15 (53%)   | 0.8                       | 184F               | 28/92 (30%)  | 0         | 0                                | 1        | 2/7 (29%)  | 1    |
| D1246                     | 155/161 (96%)           | 9/9 (100%)         | Ref | Ref       | 27/28 (96%)                      | Ref        | D1246                          | 181/182 (99%)      | 1/1 (100%) | Ref       | Ref                              | 15/15 (100%) | Ref                       | D1246              | 92/92 (100%) | 0         | Ref                              | Ref      | 6/7 (86%)  | Ref  |
| 1246Y                     | 6/161 (4%)              | 0                  | 0   | 1         | 0                                | 0.6        | 1246Y                          | 1/182(<1%)         | 0          | 0         | 1                                | 0            | 1                         | 1246Y              | 0            | 0         | -                                | -        | 1/7 (14%)  | 0.07 |

SNP: single nucleotide polymorphism; ACPR: adequate clinical and parasitological failure; DF: day of failure; RR: relative risk; Ref: reference

† Relative risk of treatment failure (recrudescence)

†† Statistical significance of difference in risk of treatment failure (recrudescence)

††† Statistical significance of difference in risk of treatment failure (recrudescence or reinfection)
